# Supplementary material for: Unique photosynthetic phenotypes in Portulaca (Portulacaceae): C3-C4 intermediates and NAD-ME C4 species with Pilosoid-type Kranz anatomy
Source: PubMed Central journal article supplement (PMC5853368; doi:10.1093/jxb/erw393), 2016-12-15

## Supplementary data

### Identification and characterization of unique photosynthetic phenotypes in *Portulaca* (Portulacaceae): C<sub>3</sub>-C<sub>4</sub> intermediates and NAD-ME C<sub>4</sub> species with Pilosoid type Kranz anatomy.

Elena V. Voznesenskaya, Nuria K. Koteyeva, Gerald E. Edwards, and Gilberto Ocampo

**Fig. S1.** Electron microscopy of *in situ* immunolocalization of glycine decarboxylase (GDC) in M (A, C, E, G, I) and BS (B, D, F, H, J) cells of *Portulaca* species having different types of photosynthesis, and the C<sub>3</sub> outgroup *Sesuvium portulacastrum*. Gold particles in M and BS cells in C<sub>3</sub> *S. portulacastrum* (A, B), C<sub>3</sub>-C<sub>4</sub> *P. hirsutissima* (C, D), C<sub>3</sub>-C<sub>4</sub> *P. mucronata* (E, F), C<sub>3</sub>-C<sub>4</sub> *P. cryptopetala* variety from Uruguay (G, H) and C<sub>4</sub> *P. oleracea* (I, J). Scale bars = 0.2 μm for C, D; 0.5 μm for A, B, E-H. c, chloroplast; m, mitochondria. Also, see Voznesenskaya *et al.*, (2010) which showed selective localization of GDC in mitochondria in BS cells of *P. cryptopetala* variety from Argentina, whereas the C<sub>3</sub> outgroup species *S. portulacastrum* had equivalent labeling in M and BS mitochondria.

Mesophyll

BS

*S. portulacastrum*, C<sub>3</sub>

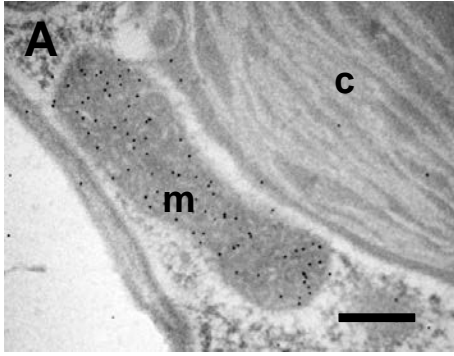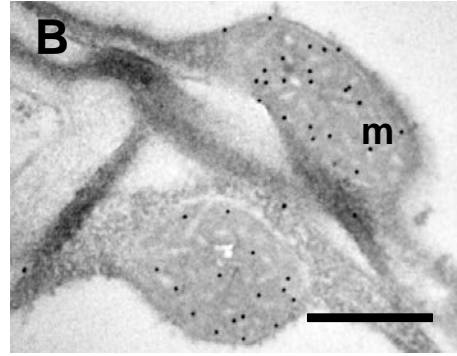

*P. hirsutissima*, C<sub>3</sub>-C<sub>4</sub>

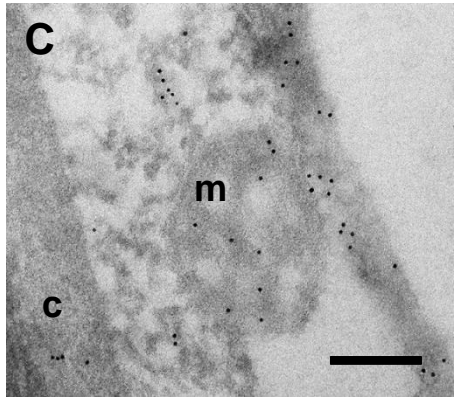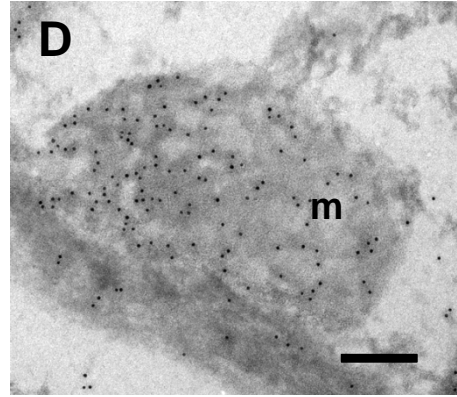

*P. mucronata*, C<sub>3</sub>-C<sub>4</sub>

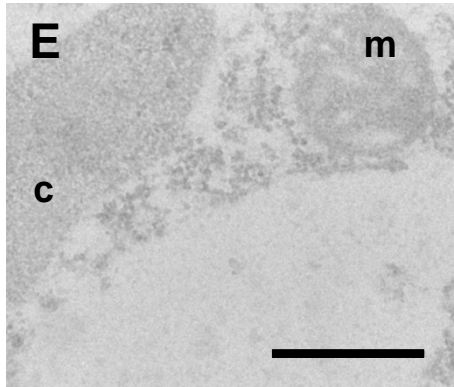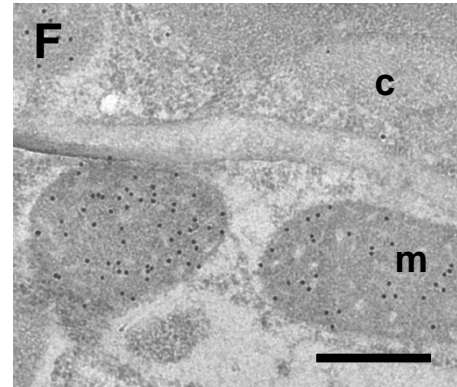

*P. cryptopetala*, C<sub>3</sub>-C<sub>4</sub>

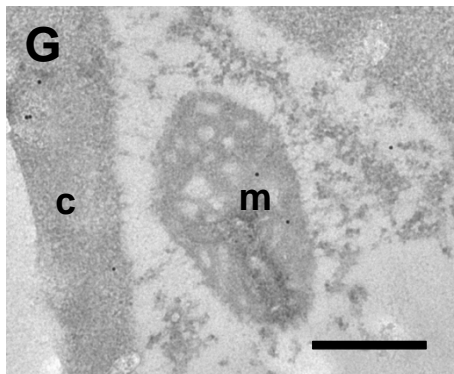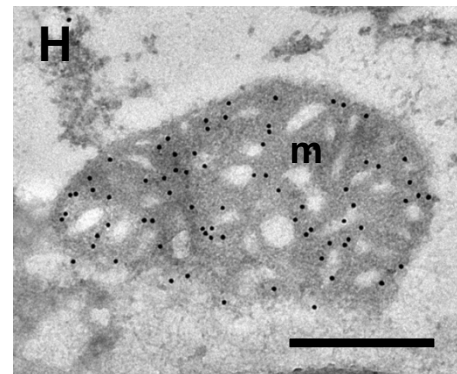

*P. oleracea*, C<sub>4</sub>

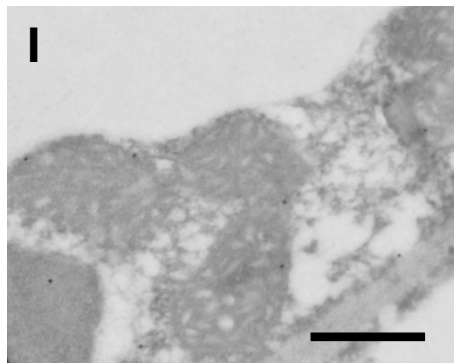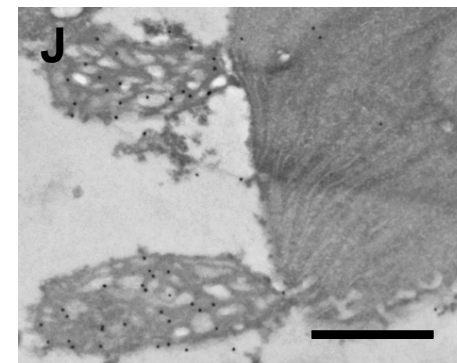

Supplement: erw393_suppl_supplementary_figure_s1.pdf [file erw393_suppl_supplementary_figure_s1.pdf]
